# Supplementary material for: Tuning the magnetic properties of dinuclear cobalt–tetraoxolene compounds: from valence tautomerism to ferromagnetic coupling
Source: Royal Society of Chemistry journal article supplement (doi:10.1039/d3qi01706k), 2023-01-01
Supplement: d3qi01706k2.pdf [file d3qi01706k2.pdf]

Supporting Information  
for

**Tuning the Magnetic Properties of Dinuclear Cobalt-Tetraoxolene  
Compounds: From Valence Tautomerism to Ferromagnetic Coupling**

Yu-Meng Zhao,<sup>a</sup> Jia-Ping Wang,<sup>a</sup> Xiang-Yi Chen,<sup>b</sup> Meng Yu,<sup>\*a</sup> Alyona A. Starikova,<sup>\*c</sup> and Jun Tao<sup>\*a</sup>

<sup>†</sup>Key Laboratory of Cluster Science of Ministry of Education, School of Chemistry and Chemical Engineering,  
Liangxiang Campus, Beijing Institute of Technology, Beijing 102488, People's Republic of China.

<sup>‡</sup>Fujian Institute for Food and Drug Quality Control, Fuzhou, Fujian 350002, People's Republic of China.

<sup>§</sup>Institute of Physical and Organic Chemistry, Southern Federal University, Stachka Avenue 194/2, Rostov-on-  
Don 344090, Russian Federation.

Email: taojun@bit.edu.cn; mengyu@bit.edu.cn; aastarikova@sfedu.ru

## Contents

|                                                                                                                                                                                                                                                                                                                        |     |
|------------------------------------------------------------------------------------------------------------------------------------------------------------------------------------------------------------------------------------------------------------------------------------------------------------------------|-----|
| <b>Table S1.</b> Frequencies (in $\text{cm}^{-1}$ ) of stretching vibrations, according to the DFT UTPSSh/6-311++G(d,p) calculations.....                                                                                                                                                                              | S4  |
| <b>Table S2.</b> Crystal data and structural refinements for <b>3</b> .....                                                                                                                                                                                                                                            | S5  |
| <b>Table S3.</b> Selected bond lengths and angles for <b>3</b> .....                                                                                                                                                                                                                                                   | S6  |
| <b>Table S4.</b> Bond valence sum (BVS) calculation for Co atoms in <b>3</b> .....                                                                                                                                                                                                                                     | S7  |
| <b>Table S5.</b> Crystal data and structural refinements for <b>4</b> and <b>5</b> .....                                                                                                                                                                                                                               | S7  |
| <b>Table S6.</b> Selected bond lengths and angles for <b>4</b> and <b>5</b> .....                                                                                                                                                                                                                                      | S8  |
| <b>Table S7.</b> Bond valence sum (BVS) calculation for Co ions in <b>4</b> and <b>5</b> .....                                                                                                                                                                                                                         | S9  |
| <b>Table S8.</b> Parameters of intermolecular interactions for <b>3</b> .....                                                                                                                                                                                                                                          | S9  |
| <b>Table S9.</b> Parameters Obtained from PHI Fitting for compounds <b>4</b> and <b>5</b> using other fitting models. ....                                                                                                                                                                                             | S9  |
| <b>Table S10.</b> Spin states ( $S$ ), total energies without ( $E$ ) and with ( $E^{ZPE}$ ) zero-point harmonic vibrations, Total enthalpies ( $H^{298}$ ) and expectation values of the spin-squared operator ( $\hat{S}^2$ ) of the compounds <b>3-5</b> calculated by the DFT UTPSSh/6-311++G(d,p) method.....     | S9  |
| <b>Table S11.</b> Relative energies without ( $\Delta E$ ) and with ( $E^{ZPE}$ ) zero-point harmonic vibrations, relative enthalpic ( $\Delta H^{298}$ ) (all values are given in $\text{kcal mol}^{-1}$ ) of charge distributions of the compounds <b>3-5</b> calculated by the DFT UTPSSh/6-311++G(d,p) method..... | S10 |
| <b>Table S12.</b> Exchange coupling parameters ( $J$ , given in $\text{cm}^{-1}$ ) in the compounds <b>3-5</b> calculated by the DFT UTPSSh/6-311++G(d,p) method.....                                                                                                                                                  | S11 |
| <b>Figure S1.</b> IR absorption spectra of <b>3-5</b> .....                                                                                                                                                                                                                                                            | S12 |
| <b>Figure S2.</b> Solid-state UV-Vis diffuse reflectance spectra of <b>3-5</b> .....                                                                                                                                                                                                                                   | S12 |
| <b>Figure S3.</b> Corresponding orbitals for Compound <b>3</b> in electronic absorption spectroscopy, as calculated by the TD-DFT method at UTPSSh/def2-SVP level of theory with CPCM (acetonitrile) solvent model.....                                                                                                | S13 |
| <b>Figure S4.</b> Corresponding orbitals for Compound <b>4</b> in electronic absorption spectroscopy, as calculated by the TD-DFT method at UTPSSh/def2-SVP level of theory with CPCM (acetonitrile) solvent model.....                                                                                                | S14 |
| <b>Figure S5.</b> Corresponding orbitals for Compound <b>3</b> in electronic absorption spectroscopy, as calculated by the TD-DFT method at UTPSSh/def2-SVP level of theory with CPCM (acetonitrile) solvent model.....                                                                                                | S15 |
| <b>Figure S6.</b> Perspective view of the cations of <b>4</b> ·S and <b>5</b> .....                                                                                                                                                                                                                                    | S16 |
| <b>Figure S7.</b> The packing diagrams of <b>3</b> .....                                                                                                                                                                                                                                                               | S16 |
| <b>Figure S8.</b> The packing diagrams of <b>4</b> .....                                                                                                                                                                                                                                                               | S17 |
| <b>Figure S9.</b> The packing diagrams of <b>5</b> .....                                                                                                                                                                                                                                                               | S17 |
| <b>Figure S10.</b> Thermogravimetric analysis of <b>3-5</b> .....                                                                                                                                                                                                                                                      | S18 |
| <b>Figure S11.</b> $\chi_M^T$ versus $T$ plot for compound <b>3</b> in the range of 300-2-390-2 K. Applied field: 5000 Oe.....                                                                                                                                                                                         | S18 |
| <b>Figure S12.</b> $M$ versus $H$ plots at 2 K for <b>4</b> .....                                                                                                                                                                                                                                                      | S19 |
| <b>Figure S13.</b> $M$ versus $H$ plots at 2 K for <b>5</b> .....                                                                                                                                                                                                                                                      | S19 |
| <b>Figure S15.</b> Magnetic susceptibilities of compounds <b>4</b> and <b>5</b> under applied field of 5000 Oe.                                                                                                                                                                                                        |     |

|                                                                                                                                                                                                                                         |     |
|-----------------------------------------------------------------------------------------------------------------------------------------------------------------------------------------------------------------------------------------|-----|
| Solid black lines represent the fitting results by the PHI program neglecting intermolecular magnetic interactions based on equation 1 .....                                                                                            | S20 |
| <b>Figure S14.</b> Magnetic susceptibilities of compounds <b>4</b> and <b>5</b> under applied field of 5000 Oe.                                                                                                                         |     |
| Solid black lines represent the fitting results by the PHI program based on equation 1 including long-distance coupling constants $J_2$ and $J_3$ during data fitting. ....                                                             | S20 |
| <b>Figure S16.</b> Optimized geometries of the compound <b>3</b> in the three charge distributions, as calculated by the DFT UTPSSh/6-311++G(d,p) method.....                                                                           | S21 |
| <b>Figure S17.</b> Optimized geometries of the compound <b>4</b> in the three charge distributions, as calculated by the DFT UTPSSh/6-311++G(d,p) method.....                                                                           | S22 |
| <b>Figure S18.</b> Corresponding orbitals for <b>4</b> and <b>5</b> visualizing the hs-Co <sup>II</sup> -Sq1 exchange interactions, as Calculated by the DFT UTPSSh/6-311++G(d,p) method (contour value = 0.03 e Å <sup>-3</sup> ) .... | S23 |
| <b>Figure S19.</b> Corresponding orbitals for Zn-SQ-SQ-Zn analogs of <b>4</b> and <b>5</b> visualizing the Co <sup>II-HS</sup> -Sq1 exchange interactions, as calculated by the DFT UTPSSh/6-311++G(d,p) method.....                    | S24 |
| <b>Figure S20.</b> Optimized geometries of the compound <b>5</b> in the three charge distributions, as calculated by the DFT UTPSSh/6-311++G(d,p) method.....                                                                           | S25 |

## 1. Additional Tables

**Table S1.** Frequencies (in  $\text{cm}^{-1}$ ) of stretching vibrations, according to the DFT UTPSSh/6-311++G(d,p) calculations.

| Complex                                                                                         | C $\equiv$ O ( $[\text{Co}(\text{CO})_4]^-$ ) | C–N ( $\text{Me}_n\text{tpa}$ ) | C–O/C=O<br>(semiquinone) | C–O<br>(catecholate) |
|-------------------------------------------------------------------------------------------------|-----------------------------------------------|---------------------------------|--------------------------|----------------------|
| <b>3</b> , $\{\text{Co}^{\text{III-LS}}\text{-pyrene}^{\text{Cat-Sq-Co}^{\text{II-HS}}}\}^{2+}$ | 2114                                          | 1660                            | 1500                     | 1448                 |
|                                                                                                 | 2107                                          | 1659                            |                          |                      |
|                                                                                                 | 2033                                          | 1632                            |                          |                      |
|                                                                                                 | 2029                                          | 1631                            |                          |                      |
|                                                                                                 | 1990                                          |                                 |                          |                      |
|                                                                                                 | 1986                                          |                                 |                          |                      |
|                                                                                                 | 1977                                          |                                 |                          |                      |
|                                                                                                 | 1974                                          |                                 |                          |                      |
| <b>4</b> , $\{\text{Co}^{\text{II-HS}}\text{-pyrene}^{\text{Sq-Sq-Co}^{\text{II-HS}}}\}^{2+}$   | 2109                                          | 1661                            | 1496                     | –                    |
|                                                                                                 | 2029                                          | 1660                            |                          |                      |
|                                                                                                 | 1985                                          | 1633                            |                          |                      |
|                                                                                                 | 1977                                          |                                 |                          |                      |
| <b>5</b> , $\{\text{Co}^{\text{II-HS}}\text{-pyrene}^{\text{Sq-Sq-Co}^{\text{II-HS}}}\}^{2+}$   | 2109                                          | 1661                            | 1497                     | –                    |
|                                                                                                 | 2030                                          | 1659                            |                          |                      |
|                                                                                                 | 1986                                          | 1634                            |                          |                      |
|                                                                                                 | 1978                                          |                                 |                          |                      |

**Table S2.** Crystal data and structural refinements for **3**.

|                                                    | <b>3</b>                                                                       |                                                                                |                                                                                |
|----------------------------------------------------|--------------------------------------------------------------------------------|--------------------------------------------------------------------------------|--------------------------------------------------------------------------------|
| <i>T</i> / K                                       | 100                                                                            | 298                                                                            | 360                                                                            |
| Formula                                            | C <sub>82</sub> H <sub>74</sub> Co <sub>4</sub> N <sub>8</sub> O <sub>12</sub> | C <sub>68</sub> H <sub>58</sub> Co <sub>4</sub> N <sub>8</sub> O <sub>12</sub> | C <sub>68</sub> H <sub>58</sub> Co <sub>4</sub> N <sub>8</sub> O <sub>12</sub> |
| <i>M</i> <sub>r</sub> / g mol <sup>−1</sup>        | 1599.21                                                                        | 1414.94                                                                        | 1414.94                                                                        |
| Crystal system                                     | Monoclinic                                                                     |                                                                                |                                                                                |
| Space group                                        | <i>P</i> 2 <sub>1</sub> / <i>c</i>                                             |                                                                                |                                                                                |
| <i>a</i> / Å                                       | 8.7470(5)                                                                      | 8.8691(8)                                                                      | 8.9372(4)                                                                      |
| <i>b</i> / Å                                       | 17.2680(7)                                                                     | 17.7249(14)                                                                    | 17.7258(8)                                                                     |
| <i>c</i> / Å                                       | 24.2915(1)                                                                     | 24.8969(18)                                                                    | 24.7614(10)                                                                    |
| <i>α</i> / °                                       | 90                                                                             | 90                                                                             | 90                                                                             |
| <i>β</i> / °                                       | 92.161(4)                                                                      | 91.742(8)                                                                      | 92.352(4)                                                                      |
| <i>γ</i> / °                                       | 90                                                                             | 90                                                                             | 90                                                                             |
| <i>V</i> / Å <sup>3</sup>                          | 3666.5(3)                                                                      | 3912.1(5)                                                                      | 3919.4(3)                                                                      |
| <i>Z</i>                                           | 2                                                                              |                                                                                |                                                                                |
| <i>ρ</i> <sub>calc</sub> / g cm <sup>−3</sup>      | 1.449                                                                          | 1.201                                                                          | 1.199                                                                          |
| <i>μ</i> / mm <sup>−1</sup>                        | 0.959                                                                          | 0.890                                                                          | 0.888                                                                          |
| <i>F</i> (000)                                     | 1652.0                                                                         | 1452.0                                                                         | 1452.0                                                                         |
| <i>R</i> <sub>int</sub> / %                        | 7.34                                                                           | 7.15                                                                           | 3.86                                                                           |
| <i>R</i> <sub>1</sub> [ <i>I</i> ≥ 2σ( <i>I</i> )] | 0.0732                                                                         | 0.0760                                                                         | 0.0738                                                                         |
| <i>wR</i> <sub>2</sub> (all data)                  | 0.1936                                                                         | 0.2270                                                                         | 0.2432                                                                         |
| CCDC no.                                           | 2224738                                                                        | 2224741                                                                        | 2224744                                                                        |

**Table S3.** Selected bond lengths and angles for **3**.

|                             | <b>3</b>  |          |          |
|-----------------------------|-----------|----------|----------|
| <i>T</i> / K                | 100       | 298      | 360      |
| Co1-O1 / Å                  | 1.868(2)  | 1.896(3) | 1.976(3) |
| Co1-O2 / Å                  | 1.879(3)  | 1.930(3) | 1.933(3) |
| Co1-N1 / Å                  | 1.965(3)  | 2.008(3) | 2.061(4) |
| Co1-N2 / Å                  | 1.925(3)  | 1.968(3) | 2.008(4) |
| Co1-N3 / Å                  | 1.920(3)  | 1.971(3) | 2.016(4) |
| Co1-N4 / Å                  | 1.922(3)  | 1.968(3) | 1.997(4) |
| O1-C1 / Å                   | 1.358(4)  | 1.342(4) | 1.301(6) |
| O2-C2 / Å                   | 1.352(4)  | 1.330(4) | 1.327(5) |
| C1-C2 / Å                   | 1.380(5)  | 1.402(5) | 1.400(6) |
| C1-C5 / Å                   | 1.430(5)  | 1.428(5) | 1.450(6) |
| C2-C3 / Å                   | 1.438(5)  | 1.432(5) | 1.414(6) |
| C3-C4 / Å                   | 1.426(5)  | 1.410(5) | 1.421(5) |
| C4-C4 / Å                   | 1.427(5)  | 1.428(4) | 1.441(6) |
| C4-C5 / Å                   | 1.423(4)  | 1.421(4) | 1.420(6) |
| N2-Co1-N1                   | 85.62(1)  | 83.58(1) | 82.16(2) |
| N2-Co1-N3                   | 170.0(7)  | 166.5(1) | 163.4(1) |
| N3-Co1-N1                   | 84.73(1)  | 83.06(1) | 81.67(1) |
| N4-Co1-N1                   | 86.12(1)  | 84.01(1) | 83.08(1) |
| N4-Co1-N2                   | 92.19(1)  | 91.66(1) | 88.88(1) |
| N4-Co1-N3                   | 89.89(1)  | 89.12(1) | 92.68(1) |
| O1-Co1-N1                   | 178.6(1)  | 178.6(1) | 179.1(1) |
| O1-Co1-N2                   | 95.00(1)  | 97.05(1) | 87.88(2) |
| O1-Co1-N3                   | 94.71(1)  | 96.33(1) | 98.54(1) |
| O1-Co1-N4                   | 92.57 (1) | 94.78(1) | 96.10(1) |
| O2-Co1-N1                   | 91.78(1)  | 94.50(1) | 96.17(1) |
| O2-Co1-N2                   | 89.38(1)  | 90.39(1) | 87.82(1) |
| O2-Co1-N3                   | 88.19(1)  | 88.47(1) | 90.39(1) |
| O2-Co1-N4                   | 177.28(1) | 177.3(1) | 176.6(1) |
| O2-Co1-O1                   | 89.50(1)  | 86.69(1) | 84.62(1) |
| $\Sigma$ / deg <sup>a</sup> | 32.81     | 49.76    | 63.32    |
| $\Theta$ / deg <sup>b</sup> | 88.85     | 135.9    | 175.6    |
| Diox MOS <sup>c</sup>       | -1.8      | -1.6     | -1.4     |

<sup>a</sup>The sum of the deviation of 12 unique *cis* ligand-metal-ligand angles from 90°. <sup>b</sup>The sum of the deviation of 24 unique torsional angles between the ligand atoms on opposite triangular faces of the octahedron viewed along the *pseudo*-threefold axis from 60°. <sup>c</sup>Empirical metrical oxidation state of tetraoxolene ligands, proposed by Brown et al. uses a least-squares fitting of C–C and C–O bond lengths to assign an apparent oxidation state: –1 for a semiquinonate ligand and –2 for a catecholate ligand.

**Table S4.** Bond valence sum (BVS)<sup>a</sup> calculation for Co atoms in **3**.

| <b>3</b>     |     |     |     |
|--------------|-----|-----|-----|
| <i>T</i> / K | 100 | 298 | 360 |
| Atom         | Co1 | Co1 | Co1 |
| BVS          | 3.1 | 2.8 | 2.5 |

**Table S5.** Crystal data and structural refinements for **4** and **5**.

|                                                    | <b>4</b>                                                                       | <b>5</b>                                                                                       |
|----------------------------------------------------|--------------------------------------------------------------------------------|------------------------------------------------------------------------------------------------|
| <i>T</i> / K                                       | 100                                                                            | 100                                                                                            |
| Formula                                            | C <sub>70</sub> H <sub>62</sub> Co <sub>4</sub> N <sub>8</sub> O <sub>12</sub> | C <sub>74</sub> H <sub>68</sub> Co <sub>4</sub> Cl <sub>6</sub> N <sub>8</sub> O <sub>12</sub> |
| <i>M</i> <sub>r</sub> / g mol <sup>−1</sup>        | 1442.99                                                                        | 1709.78                                                                                        |
| Crystal system                                     | Monoclinic                                                                     | Triclinic                                                                                      |
| Space group                                        | <i>P</i> 2 <sub>1</sub> /c                                                     | <i>P</i> $\bar{1}$                                                                             |
| <i>a</i> / Å                                       | 14.477(2)                                                                      | 11.8002(5)                                                                                     |
| <i>b</i> / Å                                       | 15.1685(7)                                                                     | 12.6052(7)                                                                                     |
| <i>c</i> / Å                                       | 24.167(3)                                                                      | 16.1129(8)                                                                                     |
| $\alpha$ / °                                       | 90                                                                             | 103.951(4)                                                                                     |
| $\beta$ / °                                        | 135.18(3)                                                                      | 97.024(4)                                                                                      |
| $\gamma$ / °                                       | 90                                                                             | 106.222(4)                                                                                     |
| <i>V</i> / Å <sup>3</sup>                          | 3740.7(14)                                                                     | 2186.65(19)                                                                                    |
| <i>Z</i>                                           | 2                                                                              | 1                                                                                              |
| $\rho_{\text{calc}}$ / g cm <sup>−3</sup>          | 1.281                                                                          | 1.298                                                                                          |
| $\mu$ / mm <sup>−1</sup>                           | 0.932                                                                          | 0.985                                                                                          |
| <i>F</i> (000)                                     | 1484.0                                                                         | 874.0                                                                                          |
| <i>R</i> <sub>int</sub> / %                        | 5.88                                                                           | 6.80                                                                                           |
| <i>R</i> <sub>1</sub> [ <i>I</i> ≥ 2σ( <i>I</i> )] | 0.1286                                                                         | 0.0774                                                                                         |
| <i>wR</i> <sub>2</sub> (all data)                  | 0.3994                                                                         | 0.2308                                                                                         |
| CCDC no.                                           | 2287990                                                                        | 2158906                                                                                        |

**Table S6.** Selected bond lengths and angles for **4** and **5**.

|                             | <b>4</b>  | <b>5</b>  |
|-----------------------------|-----------|-----------|
| <i>T</i> / K                | 100       | 100       |
| Co1-O1 / Å                  | 2.006(6)  | 2.015(3)  |
| Co1-O2 / Å                  | 2.076(8)  | 2.129(2)  |
| Co1-N1 / Å                  | 2.130(7)  | 2.160(4)  |
| Co1-N2 / Å                  | 2.150(3)  | 2.151(4)  |
| Co1-N3 / Å                  | 2.146(4)  | 2.186(3)  |
| Co1-N4 / Å                  | 2.074(6)  | 2.186(3)  |
| O1-C1 / Å                   | 1.274(9)  | 1.291(4)  |
| O2-C2 / Å                   | 1.290(7)  | 1.272(4)  |
| C1-C2 / Å                   | 1.454(8)  | 1.448(5)  |
| C1-C5 / Å                   | 1.454(8)  | 1.449(5)  |
| C2-C3 / Å                   | 1.435(1)  | 1.461(5)  |
| C3-C4 / Å                   | 1.421(8)  | 1.416(5)  |
| C4-C4' / Å                  | 1.423(1)  | 1.449(5)  |
| C4-C5 / Å                   | 1.41(1)   | 1.416(5)  |
| N2-Co1-N1                   | 78.64(2)  | 77.08(1)  |
| N2-Co1-N3                   | 155.4(1)  | 155.1(1)  |
| N3-Co1-N1                   | 77.17(2)  | 79.47(1)  |
| N4-Co1-N1                   | 82.13(2)  | 80.81(1)  |
| N4-Co1-N2                   | 85.36(1)  | 99.42(1)  |
| N4-Co1-N3                   | 95.75(2)  | 84.96(1)  |
| O1-Co1-N1                   | 175.4(2)  | 174.1(1)  |
| O1-Co1-N2                   | 105.6(1)  | 105.3(1)  |
| O1-Co1-N3                   | 98.70(2)  | 97.23(1)  |
| O1-Co1-N4                   | 96.28(2)  | 103.9 (1) |
| O2-Co1-N1                   | 101.1(2)  | 94.88(1)  |
| O2-Co1-N2                   | 89.42(1)  | 87.36(1)  |
| O2-Co1-N3                   | 90.80(2)  | 86.34(1)  |
| O2-Co1-N4                   | 173.2(1)  | 171.8(1)  |
| O2-Co1-O1                   | 80.97(17) | 79.97(1)  |
| $\Sigma$ / deg <sup>a</sup> | 94.58     | 104.8     |
| $\Theta$ / deg <sup>b</sup> | 285.5     | 267.1     |
| Diox MOS <sup>c</sup>       | -1.05     | -0.96     |

<sup>a</sup>The sum of the deviation of 12 unique *cis* ligand-metal-ligand angles from 90°. <sup>b</sup>The sum of the deviation of 24 unique torsional angles between the ligand atoms on opposite triangular faces of the octahedron viewed along the *pseudo*-threefold axis from 60°. <sup>c</sup>Empirical metrical oxidation state of tetraoxolene ligands, proposed by Brown et al. uses a least-squares fitting of C–C and C–O bond lengths to assign an apparent oxidation state: –1 for a semiquinonate ligand and –2 for a catecholate ligand.



**Table S7.** Bond valence sum (BVS)<sup>a</sup> calculation for Co atoms in **4** and **5**.

|              | <b>4</b> | <b>5</b> |
|--------------|----------|----------|
| <i>T</i> / K | 100      | 100      |
| Atom         | Co1      | Co1      |
| BVS          | 1.9      | 1.7      |

**Table S8.** Parameters of intermolecular interactions for **3**.

|                      | <b>3</b>    |               |             |               |             |               |
|----------------------|-------------|---------------|-------------|---------------|-------------|---------------|
| <i>T</i> / K         | 100         |               | 298         |               | 360         |               |
|                      | lengths / Å | angles / deg. | lengths / Å | angles / deg. | lengths / Å | angles / deg. |
| $\pi \cdots \pi$ / Å | 3.867       | -             | 3.944       | -             | 4.008       | -             |
| C–H $\cdots\pi$ / Å  | 3.554       | 156.7         | 3.735       | 151.7         | 3.785       | 151.9         |

**Table S9.** Parameters Obtained from PHI Fitting for compounds **4** and **5** using two other fitting models.

|                                            | PHI fitting          |                      | PHI fitting |          |
|--------------------------------------------|----------------------|----------------------|-------------|----------|
|                                            | <b>4</b>             | <b>5</b>             | <b>4</b>    | <b>5</b> |
| $g_{Co}$                                   | 2.10                 | 2.00                 | 2.04        | 2.00     |
| $D$ (cm <sup>-1</sup> )                    | 45.0                 | 28.6                 | 59.7        | 24.0     |
| $J$ (cm <sup>-1</sup> )                    | 32.8                 | 150                  | 121.2       | 137.7    |
| $J_1$ (cm <sup>-1</sup> )                  | 51.4                 | 43.6                 | 63.2        | 56.7     |
| $J_2$ (cm <sup>-1</sup> )                  | –                    | –                    | -4.6        | -3.5     |
| $J_3$ (cm <sup>-1</sup> )                  | –                    | –                    | -0.8        | 0.0      |
| $zJ'$ (cm <sup>-1</sup> )                  | –                    | –                    | –           | –        |
| $TIP$ (cm <sup>3</sup> mol <sup>-1</sup> ) | $3.6 \times 10^{-4}$ | $5.7 \times 10^{-4}$ | –           | –        |

**Table S10.** Spin states (*S*), total energies without (*E*) and with (*E*<sup>ZPE</sup>) zero-point harmonic vibrations, total enthalpies (*H*<sup>298</sup>) and expectation values of the spin-squared operator ( $\hat{S}^2$ ) of the compounds **3** -**5** calculated by the DFT UTPSSh/6-311++G(d,p) method.

| Charge Distribution                                                                | <i>S</i> | <i>E</i> , a.u. | <i>E</i> <sup>ZPE</sup> , a.u. | <i>H</i> <sup>298</sup> , a.u. | $\hat{S}^2$ |
|------------------------------------------------------------------------------------|----------|-----------------|--------------------------------|--------------------------------|-------------|
| <b>Compound 3</b>                                                                  |          |                 |                                |                                |             |
| {ls-Co <sup>III</sup> (tpa)–pyrene <sup>Cat-Cat</sup> –ls-Co <sup>III</sup> (tpa)} | 0        | -9499.602610    | -9498.462301                   | -9498.380696                   | 0.000       |
| {ls-Co <sup>III</sup> (tpa)–pyrene <sup>Cat-Sq</sup> –hs-Co <sup>II</sup> (tpa)}   | 2        | -9499.598192    | -9498.461007                   | -9498.376493                   | 6.016       |

|                                                                                                                    |   |              |              |              |        |
|--------------------------------------------------------------------------------------------------------------------|---|--------------|--------------|--------------|--------|
| $\beta\alpha^a$                                                                                                    | 1 | -9499.596922 | —            | —            | 2.988  |
| {hs-Co <sup>II</sup> (tpa)–pyrene <sup>Sq-Sq</sup> –hs-Co <sup>II</sup> (tpa)}                                     | 4 | -9499.590856 | -9498.457531 | -9498.373622 | 20.032 |
| $\alpha\beta\beta\alpha$                                                                                           | 2 | -9499.587535 | —            | —            | 7.984  |
| $\alpha\alpha\beta\beta$                                                                                           | 0 | -9499.589450 | —            | —            | 4.004  |
| $\alpha\beta\alpha\beta$                                                                                           | 0 | -9499.586315 | —            | —            | 3.949  |
| $\alpha\beta\alpha\alpha$                                                                                          | 3 | -9499.587840 | —            | —            | 12.975 |
| $\beta\alpha\alpha\alpha$                                                                                          | 1 | -9499.589286 | —            | —            | 5.009  |
| <b>Compound 4</b>                                                                                                  |   |              |              |              |        |
| {ls-Co <sup>III</sup> (Metpa)–pyrene <sup>Cat-Cat</sup> –ls-Co <sup>III</sup> (Metpa)}                             | 0 | -9578.256293 | -9577.060359 | -9576.974602 | 0.000  |
| {ls-Co <sup>III</sup> (Metpa)–pyrene <sup>Cat-Sq</sup> –hs-Co <sup>II</sup> (Metpa)}                               | 2 | -9578.257212 | -9577.064794 | -9576.976897 | 6.016  |
| $\beta\alpha$                                                                                                      | 1 | -9578.255285 | —            | —            | 3.005  |
| {hs-Co <sup>II</sup> (Metpa)–pyrene <sup>Sq-Sq</sup> –hs-Co <sup>II</sup> (Metpa)}                                 | 4 | -9578.255743 | -9577.066804 | -9576.977053 | 20.031 |
| $\alpha\beta\beta\alpha$                                                                                           | 2 | -9578.250746 | —            | —            | 8.013  |
| $\alpha\alpha\beta\beta$                                                                                           | 0 | -9578.253419 | —            | —            | 4.003  |
| $\alpha\beta\alpha\beta$                                                                                           | 0 | -9578.249333 | —            | —            | 3.974  |
| $\alpha\beta\alpha\alpha$                                                                                          | 3 | -9578.251560 | —            | —            | 12.991 |
| $\beta\alpha\alpha\alpha$                                                                                          | 1 | -9578.252957 | —            | —            | 5.023  |
| <b>Compound 5</b>                                                                                                  |   |              |              |              |        |
| {ls-Co <sup>III</sup> (Me <sub>2</sub> tpa)–pyrene <sup>Cat-Cat</sup> –ls-Co <sup>III</sup> (Me <sub>2</sub> tpa)} | 0 | -9656.900813 | -9655.649592 | -9655.561084 | 0.000  |
| {ls-Co <sup>III</sup> (Me <sub>2</sub> tpa)–pyrene <sup>Cat-Sq</sup> –hs-Co <sup>II</sup> (Me <sub>2</sub> tpa)}   | 2 | -9656.909564 | -9655.661944 | -9655.572274 | 6.016  |
| $\beta\alpha$                                                                                                      | 1 | -9656.907611 | —            | —            | 3.010  |
| {hs-Co <sup>II</sup> (Me <sub>2</sub> tpa)–pyrene <sup>Sq-Sq</sup> –hs-Co <sup>II</sup> (Me <sub>2</sub> tpa)}     | 4 | -9656.915134 | -9655.671404 | -9655.579476 | 20.031 |
| $\alpha\beta\beta\alpha$                                                                                           | 2 | -9656.911122 | —            | —            | 8.019  |
| $\alpha\alpha\beta\beta$                                                                                           | 0 | -9656.913667 | —            | —            | 4.002  |
| $\alpha\beta\alpha\beta$                                                                                           | 0 | -9656.908457 | —            | —            | 3.837  |
| $\alpha\beta\alpha\alpha$                                                                                          | 3 | -9656.911670 | —            | —            | 12.992 |
| $\beta\alpha\alpha\alpha$                                                                                          | 1 | -9656.913139 | —            | —            | 5.024  |

<sup>a</sup>  $\alpha$  corresponds to spin-up,  $\beta$  corresponds to spin-down; the order of the paramagnetic centers in {Co<sup>II</sup>–pyrene<sup>Sq</sup>–Sq–Co<sup>II</sup>} charge distributions: (1) hs-Co<sup>II</sup> (2) Sq (3) Sq (4) hs-Co<sup>II</sup>

**Table S11.** Relative energies without ( $\Delta E$ ) and with ( $E^{ZPE}$ ) zero-point harmonic vibrations, relative enthalpies ( $\Delta H^{298}$ ) (all values are given in kcal mol<sup>-1</sup>) of charge distributions of the compounds **3-5** calculated by the DFT UTPSSh/6-311++G(d,p) method.

| Charge Distribution                                                                                                  | $\Delta E$ | $E^{ZPE}$ | $H^{298}$ |
|----------------------------------------------------------------------------------------------------------------------|------------|-----------|-----------|
| 3 {ls-Co <sup>III</sup> (tpa)–pyrene <sup>Cat-Cat</sup> –ls-Co <sup>III</sup> (tpa)}                                 | 0.0        | 0.0       | 0.0       |
| {ls-Co <sup>III</sup> (tpa)–pyrene <sup>Cat-Sq</sup> –hs-Co <sup>II</sup> (tpa)}                                     | 2.8        | 0.8       | 2.6       |
| {hs-Co <sup>II</sup> (tpa)–pyrene <sup>Sq-Sq</sup> –hs-Co <sup>II</sup> (tpa)}                                       | 7.4        | 3.0       | 4.4       |
| 4 {ls-Co <sup>III</sup> (Metpa)–pyrene <sup>Cat-Cat</sup> –ls-Co <sup>III</sup> (Metpa)}                             | 0.6        | 4.0       | 1.5       |
| {ls-Co <sup>III</sup> (Metpa)–pyrene <sup>Cat-Sq</sup> –hs-Co <sup>II</sup> (Metpa)}                                 | 0.0        | 1.3       | 0.1       |
| {hs-Co <sup>II</sup> (Metpa)–pyrene <sup>Sq-Sq</sup> –hs-Co <sup>II</sup> (Metpa)}                                   | 0.9        | 0.0       | 0.0       |
| 5 {ls-Co <sup>III</sup> (Me <sub>2</sub> tpa)–pyrene <sup>Cat-Cat</sup> –ls-Co <sup>III</sup> (Me <sub>2</sub> tpa)} | 9.0        | 13.7      | 11.5      |
| {ls-Co <sup>III</sup> (Me <sub>2</sub> tpa)–pyrene <sup>Cat-Sq</sup> –hs-Co <sup>II</sup> (Me <sub>2</sub> tpa)}     | 3.5        | 5.9       | 4.5       |
| {hs-Co <sup>II</sup> (Me <sub>2</sub> tpa)–pyrene <sup>Sq-Sq</sup> –hs-Co <sup>II</sup> (Me <sub>2</sub> tpa)}       | 0.0        | 0.0       | 0.0       |

**Table S12.** Exchange coupling parameters ( $J$ , given in  $\text{cm}^{-1}$ ) in the compounds **3-5** calculated by the DFT UTPSSh/6-311++G(d,p) method.

| Charge Distribution                                                                                                                  | $J(\text{hs-Co}^{\text{II}}\text{-Sq1})^a$ | $J(\text{hs-Co}^{\text{II}}\text{-Sq2})$ | $J(\text{Sq1-Sq2})$ | $J(\text{hs-Co}^{\text{II}}\text{-hs-Co}^{\text{II}})$ |
|--------------------------------------------------------------------------------------------------------------------------------------|--------------------------------------------|------------------------------------------|---------------------|--------------------------------------------------------|
| <b>Compound 3</b>                                                                                                                    |                                            |                                          |                     |                                                        |
| $\{\text{ls-Co}^{\text{III}}(\text{tpa})\text{-pyrene}^{\text{Cat-Sq}}\text{-hs-Co}^{\text{II}}(\text{tpa})\}$                       | 92                                         | —                                        | —                   | —                                                      |
| $\{\text{hs-Co}^{\text{II}}(\text{tpa})\text{-pyrene}^{\text{Sq-Sq}}\text{-hs-Co}^{\text{II}}(\text{tpa})\}$                         | 59                                         | 2                                        | 147                 | −1                                                     |
| <b>Compound 4</b>                                                                                                                    |                                            |                                          |                     |                                                        |
| $\{\text{ls-Co}^{\text{III}}(\text{Metpa})\text{-pyrene}^{\text{Cat-Sq}}\text{-hs-Co}^{\text{II}}(\text{Metpa})\}$                   | 140                                        | —                                        | —                   | —                                                      |
| $\{\text{hs-Co}^{\text{II}}(\text{Metpa})\text{-pyrene}^{\text{Sq-Sq}}\text{-hs-Co}^{\text{II}}(\text{Metpa})\}$                     | 83                                         | 8                                        | 173                 | 3                                                      |
| <b>Compound 5</b>                                                                                                                    |                                            |                                          |                     |                                                        |
| $\{\text{ls-Co}^{\text{III}}(\text{Me}_2\text{tpa})\text{-pyrene}^{\text{Cat-Sq}}\text{-hs-Co}^{\text{II}}(\text{Me}_2\text{tpa})\}$ | 143                                        | —                                        | —                   | —                                                      |
| $\{\text{hs-Co}^{\text{II}}(\text{Me}_2\text{tpa})\text{-pyrene}^{\text{Sq-Sq}}\text{-hs-Co}^{\text{II}}(\text{Me}_2\text{tpa})\}$   | 83                                         | −11                                      | 181                 | 4                                                      |

<sup>a</sup> Sq1 represents the closest (coordinating) dioxolene and Sq2 represents the dioxolene on the other side of pyrene.

### 3. Additional Figures

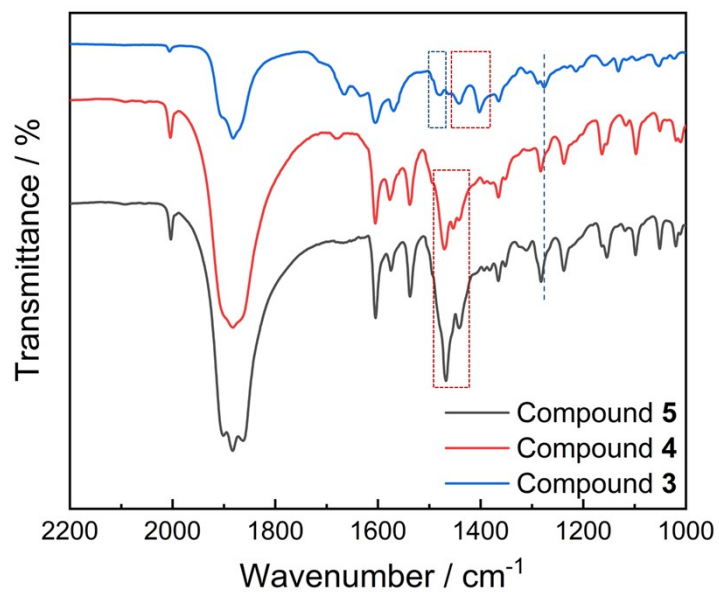

Figure S1. IR spectra of 3-5.

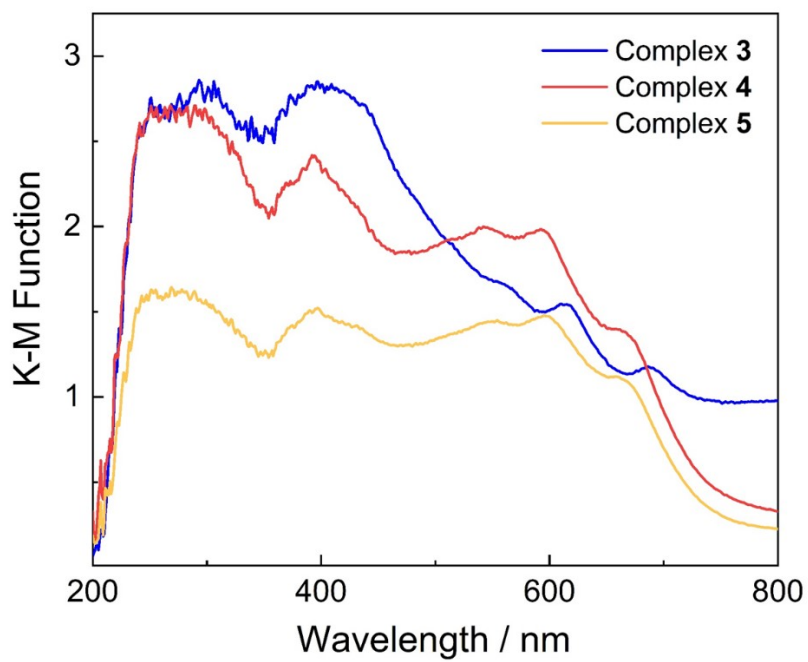

Figure S2. Solid-state UV-Vis diffuse reflectance spectra of 3-5.

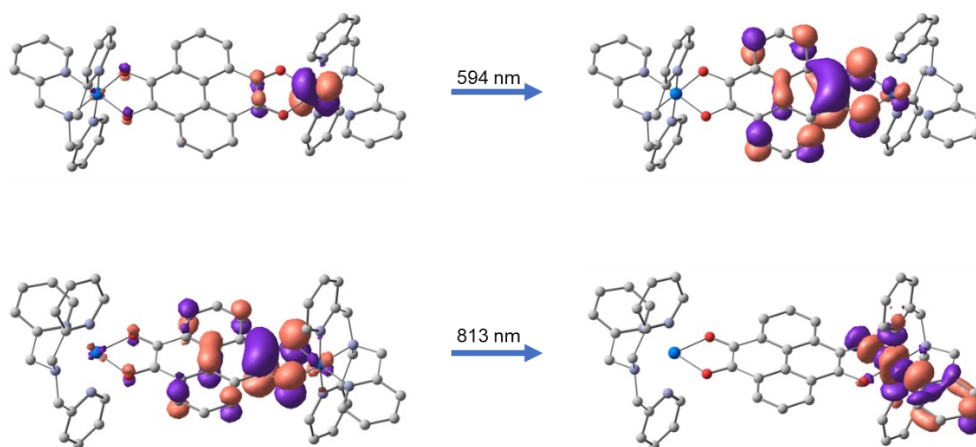

**Figure S3.** Corresponding orbitals for Compound **3** in electronic absorption spectroscopy, as calculated by the TD-DFT method at UTPSSh/def2-SVP level of theory with CPCM (acetonitrile) solvent model. The top one at 594 nm corresponds to a MLCT transition from  $\text{Co}^{\text{II-HS}}$  to the  $\pi^*$  orbital of the semiquinone. The bottom one at 813 nm can be assigned to a LMCT transition. Note that the calculation was conducted for the  $\{\text{Co}^{\text{III-LS}}\text{-pyrene}^{\text{Cat-Sq-Co}^{\text{II-HS}}}\}^{2+}$  electronic state.

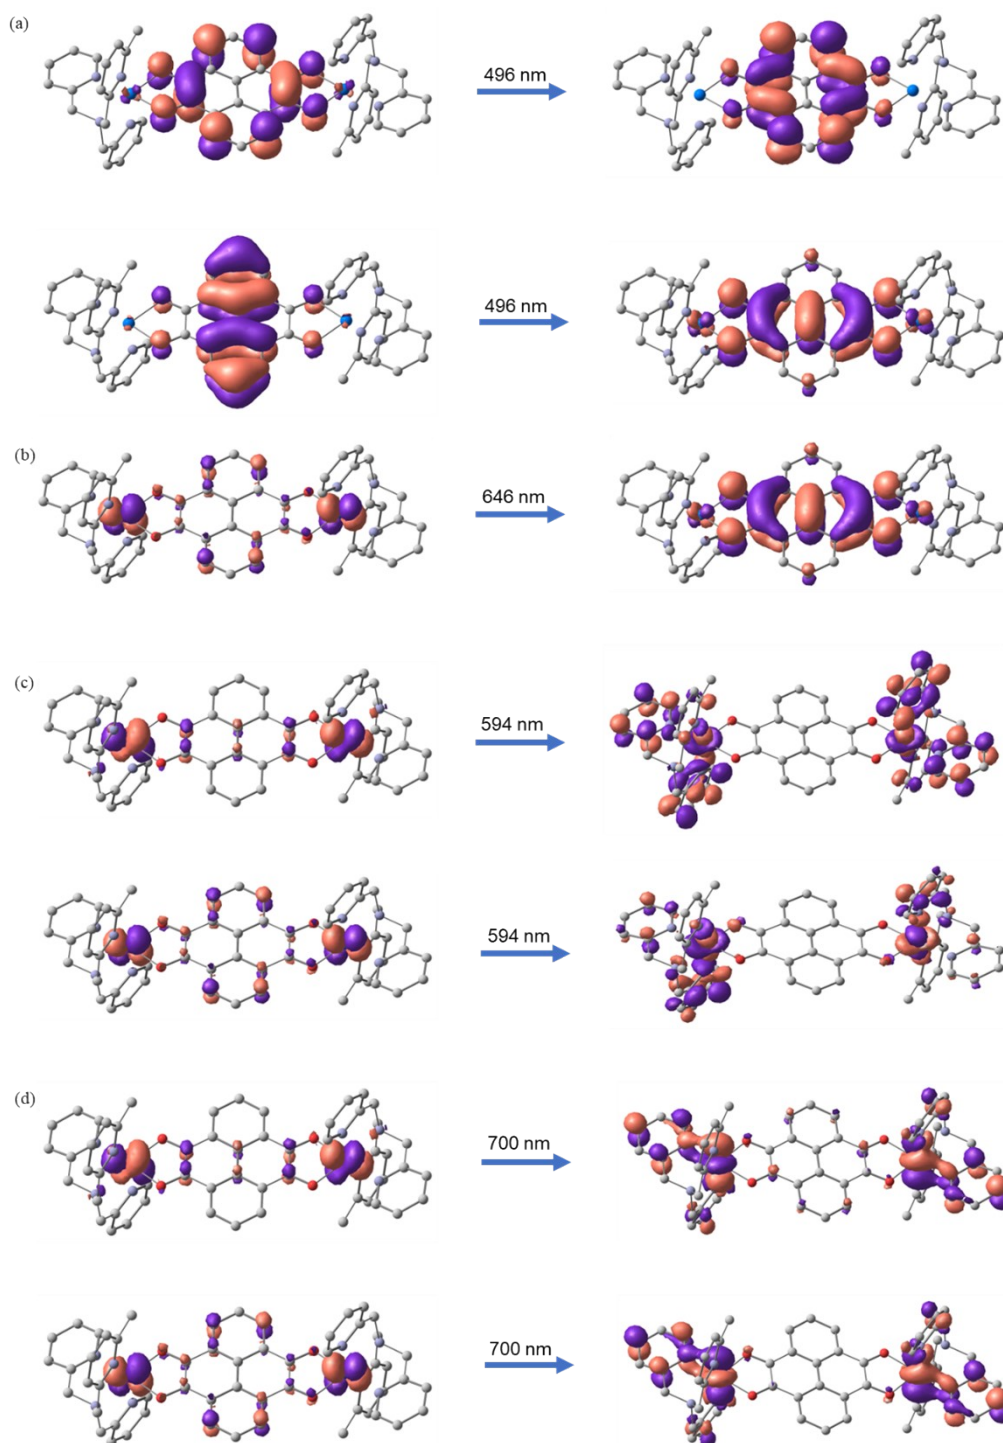

**Figure S4.** Corresponding orbitals for Compound **4** in electronic absorption spectroscopy, as calculated by the TD-DFT method at UTPSSh/def2-SVP level of theory with CPCM (acetonitrile) solvent model. (a) 496 nm transition corresponds to internal semiquinone ligand transitions within the pyrene<sup>Sq-Sq</sup> ligand; (b) 646 nm transition can be assigned to a MLCT transitions from Co<sup>II-HS</sup> to the  $\pi^*$  orbital of semiquinone; (c) 594 nm and (d) 700 nm transitions can be assigned to MLCT transitions from Co<sup>II-HS</sup> to the  $\pi^*$  orbital of MeTPA. Note that the calculation was conducted for the {Co<sup>II-HS</sup>–pyrene<sup>Sq-Sq</sup>–Co<sup>II-HS</sup>}<sup>2+</sup> electronic state.

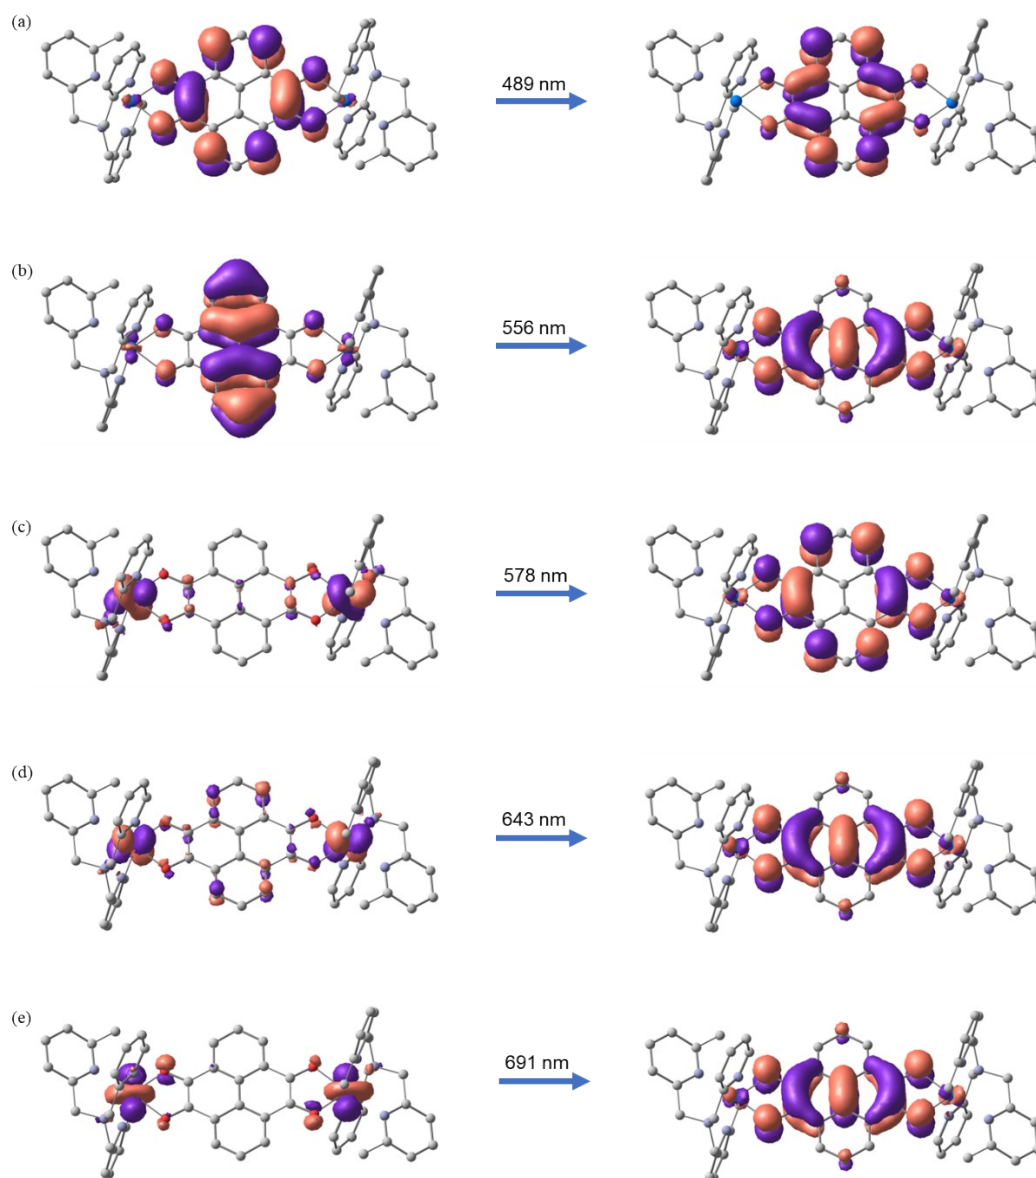

**Figure S5.** Corresponding orbitals for Compound **5** in electronic absorption spectroscopy, as calculated by the TD-DFT method at UTPSSh/def2-SVP level of theory with CPCM (acetonitrile) solvent model. (a) 496 nm and (b) 556 nm transitions correspond to internal semiquinone ligand transitions within the pyrene<sup>Sq-Sq</sup> ligand; (c) 556 nm, (d) 643 nm, and (e) 691 nm transitions can be assigned to MLCT transitions from Co<sup>II-HS</sup> to the  $\pi^*$  orbital of semiquinone. Note that the calculation was conducted for the {Co<sup>II-HS</sup>–pyrene<sup>Sq-Sq</sup>–Co<sup>II-HS</sup>}<sup>2+</sup> electronic state.

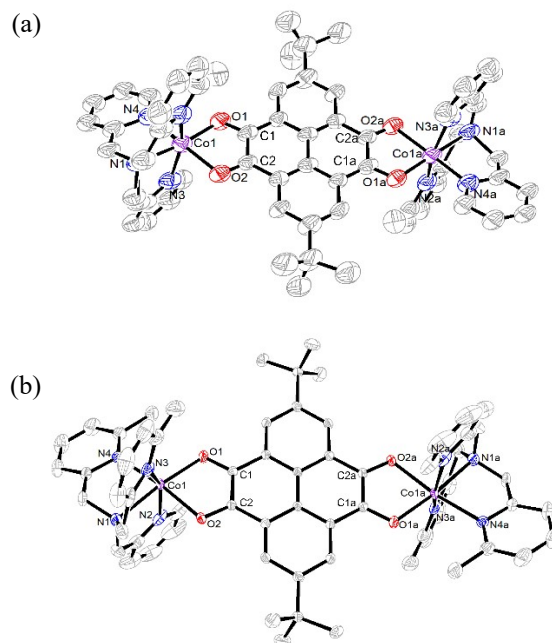

**Figure S6.** Perspective view of the dinuclear cations of **4** (a) and **5** (b) with 50% thermal ellipsoids. Hydrogen atoms, solvent molecules, and counter-ions are omitted for clarity. Symmetry codes: a)  $1 - x, 1 - y, 2 - z$ ; b)  $-x, 2 - y, 2 - z$ .

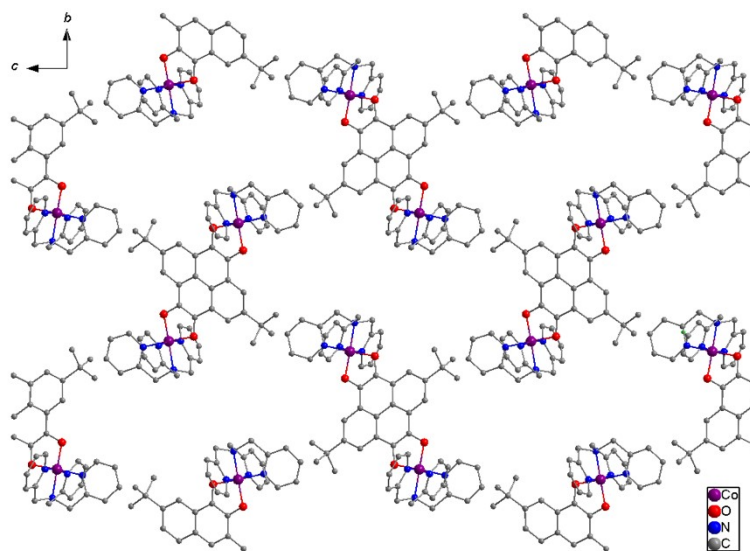

**Figure S7.** The packing diagram of **3**. Hydrogen atoms, anions, and guest solvent molecules are omitted for clarity.



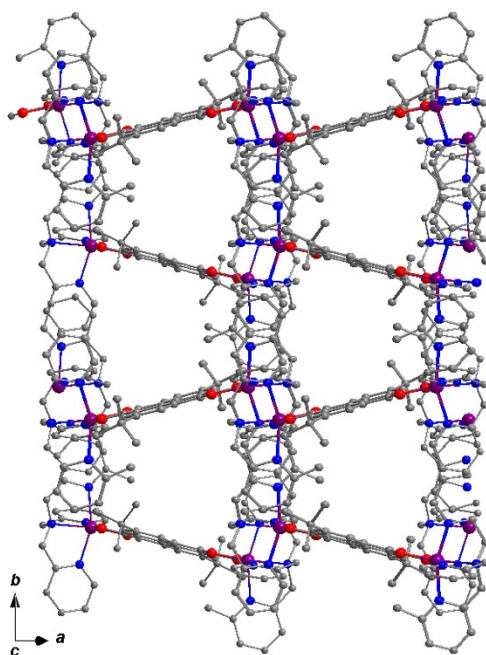

**Figure S8.** The packing diagrams of **4**. color code: Co, purple; O, red; N, blue; C, grey.

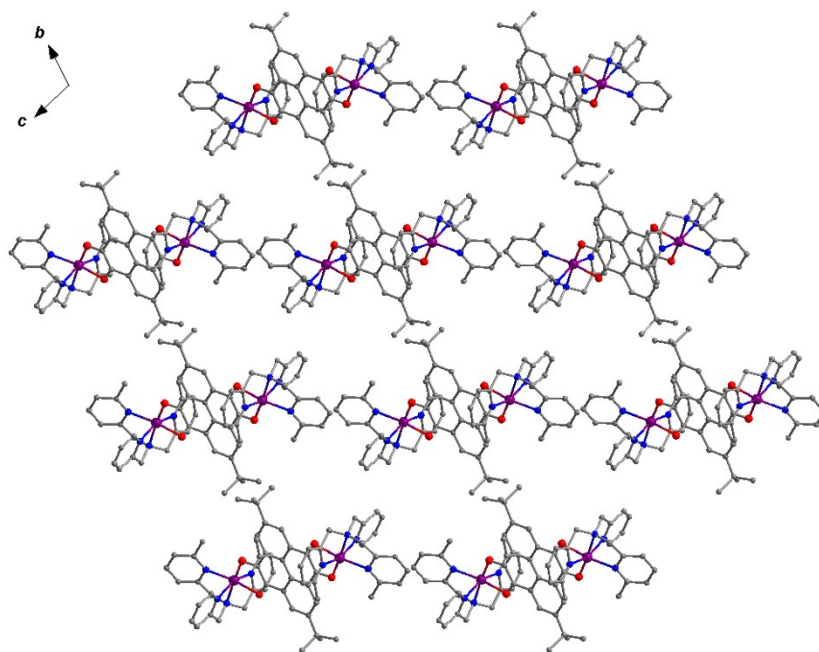

**Figure S9.** The packing diagrams of **5**. color code: Co, purple; O, red; N, blue; C, grey.

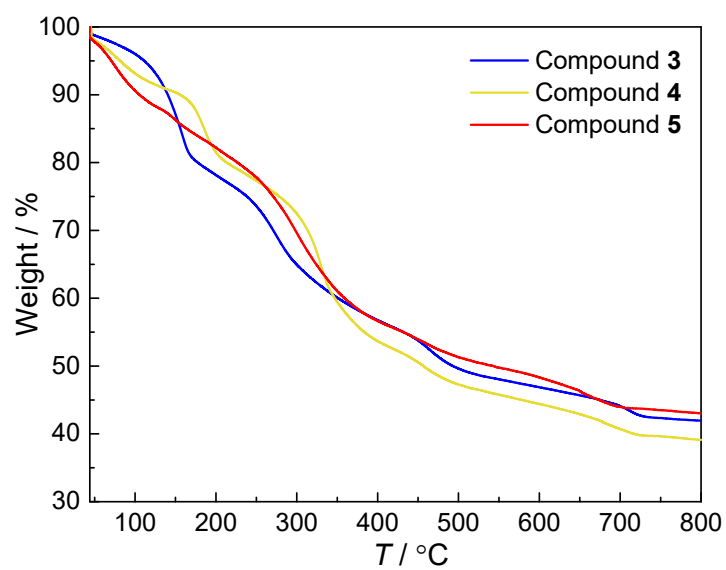

**Figure S10.** Thermogravimetric analysis of **3-5**.

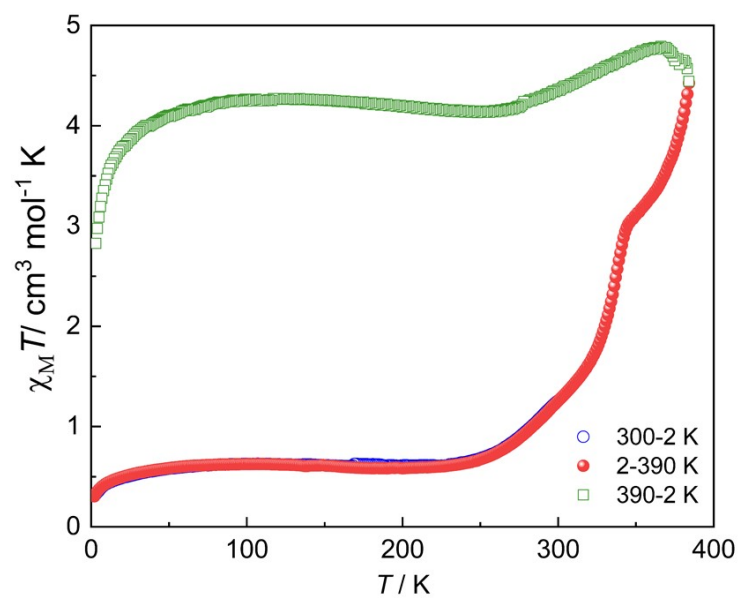

**Figure S11.**  $\chi_M T$  versus  $T$  plot for compound **3** in the range of 300-2-390-2 K. Applied field: 5000 Oe.

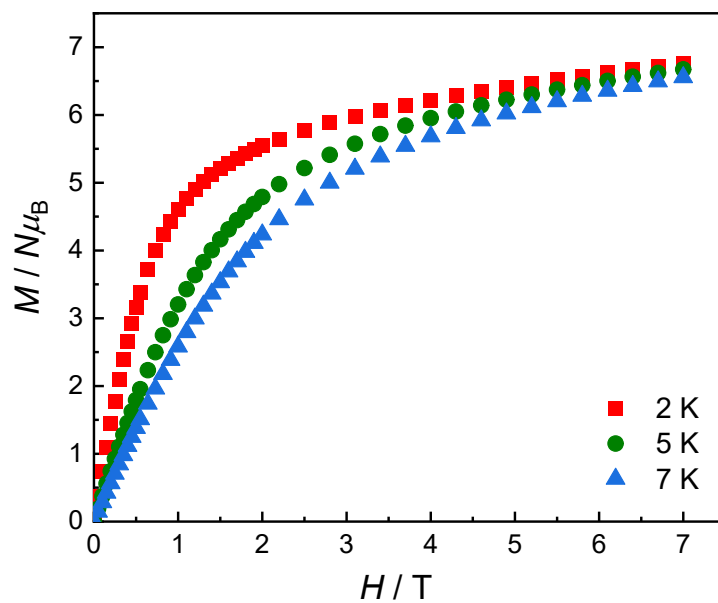

**Figure S12.**  $M$  versus  $H$  plots at 2 K, 5 K and 7 K for **4**.

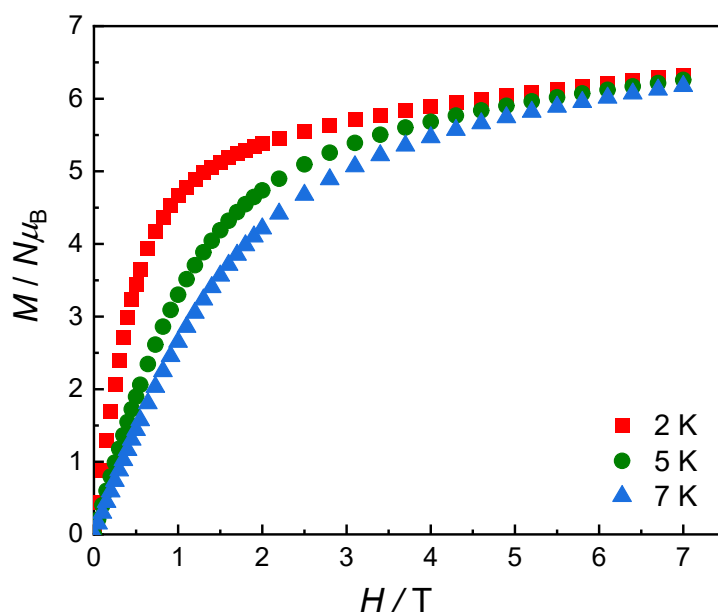

**Figure S13.**  $M$  versus  $H$  plots at 2 K, 5 K and 7 K for **5**.

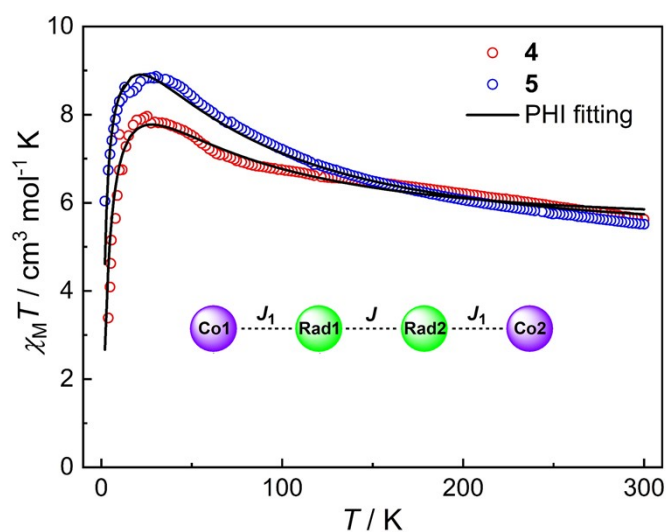

**Figure S14.** Magnetic susceptibilities of compounds **4** and **5** under applied field of 5000 Oe. Solid black lines represent the fitting results by the PHI program neglecting intermolecular magnetic interactions based on equation 1. Inset: the magnetic coupling parameters of **4** and **5**. Large inconsistency in  $J$  coupling value was observed between **4** and **5** using this fitting model.

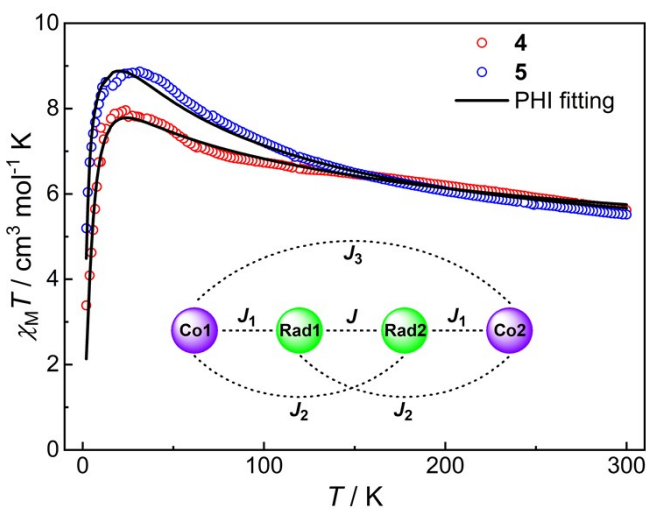

**Figure S15.** Magnetic susceptibilities of compounds **4** and **5** under applied field of 5000 Oe. Solid black lines represent the fitting results by the PHI program based on equation 1 including long-distance coupling constants  $J_2$  and  $J_3$  during data fitting. Inset: the magnetic coupling parameters of **4** and **5**. A very large  $D$  value ( $59.7 \text{ cm}^{-1}$ ) was used during data fit for compound **4**, which is unlikely.

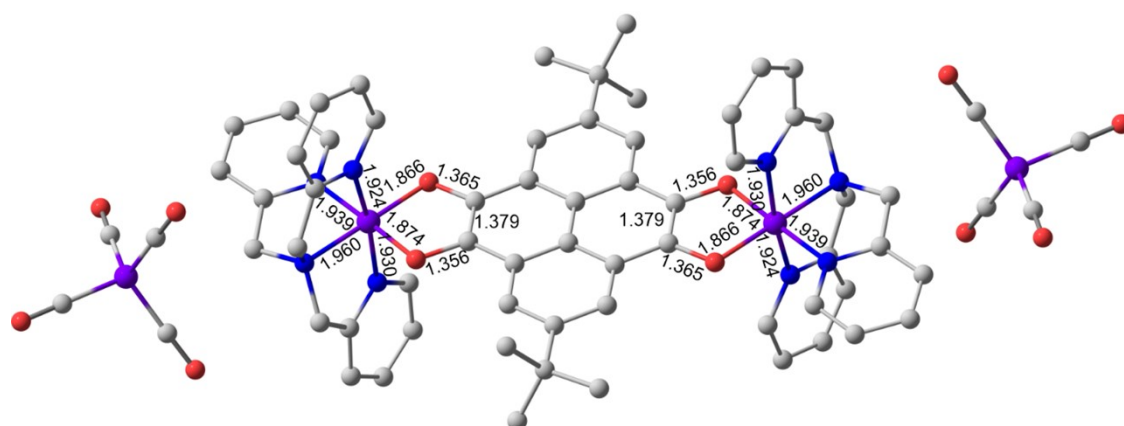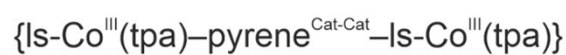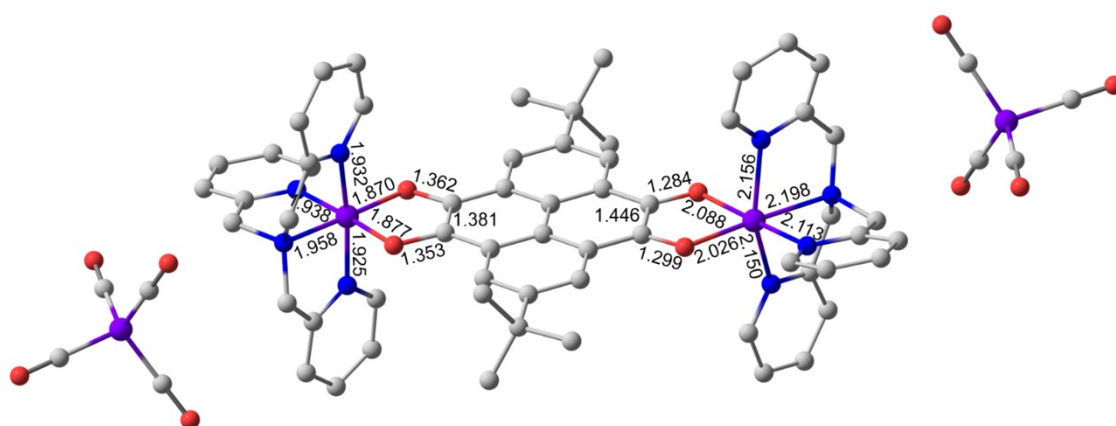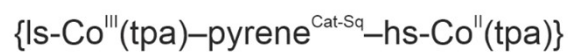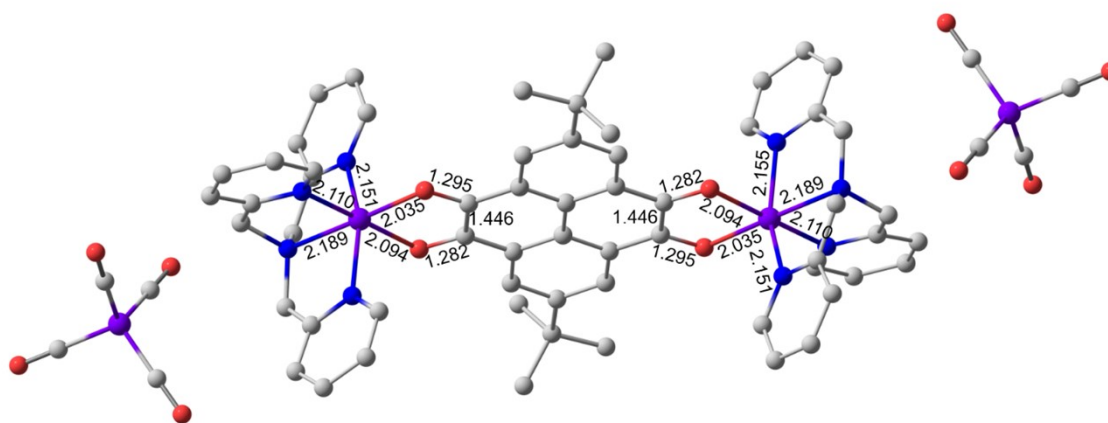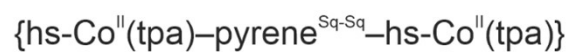

**Figure S16.** Optimized geometries of the compound **3** in the three charge distributions, as calculated by the DFT UTPSSh/6-311++G(d,p) method. Here and in **Figures S17 – S20** hydrogen atoms are omitted for clarity.

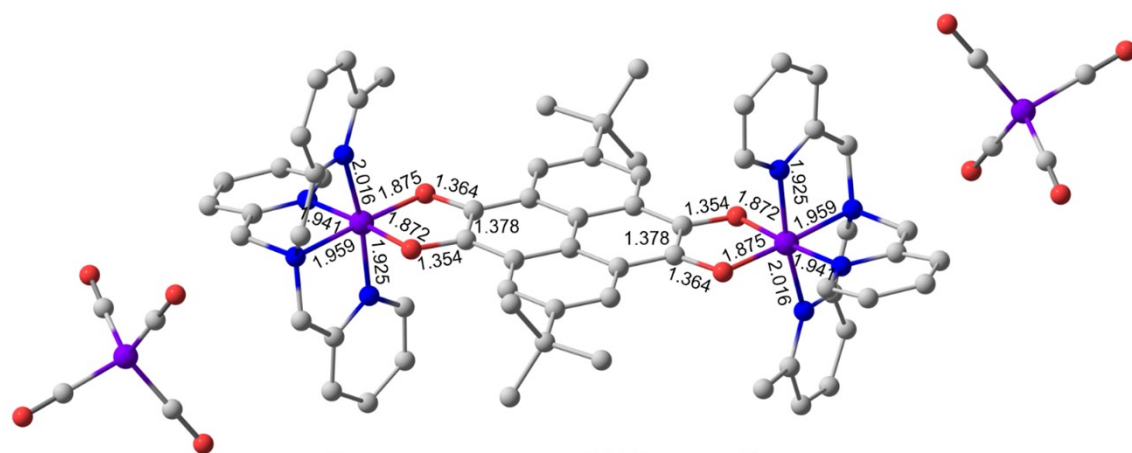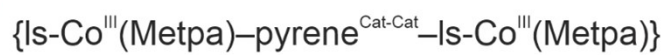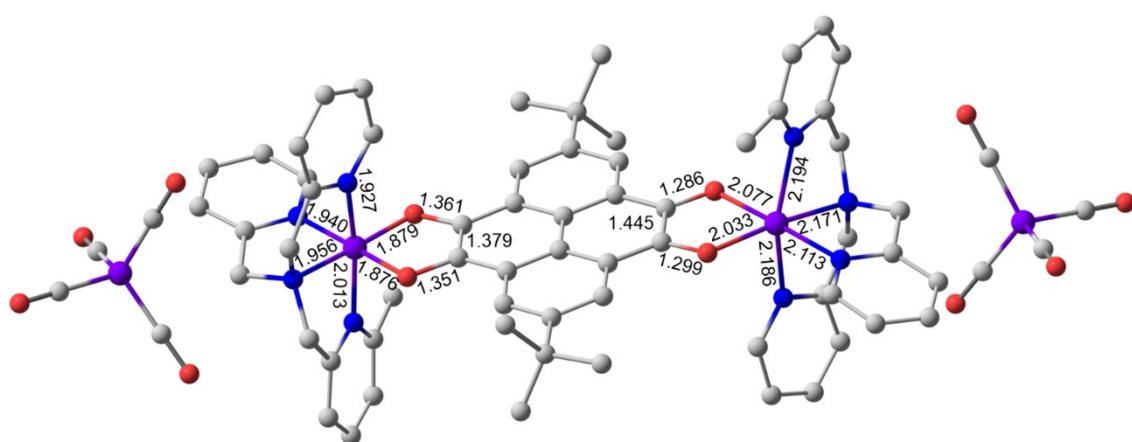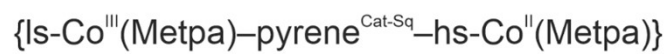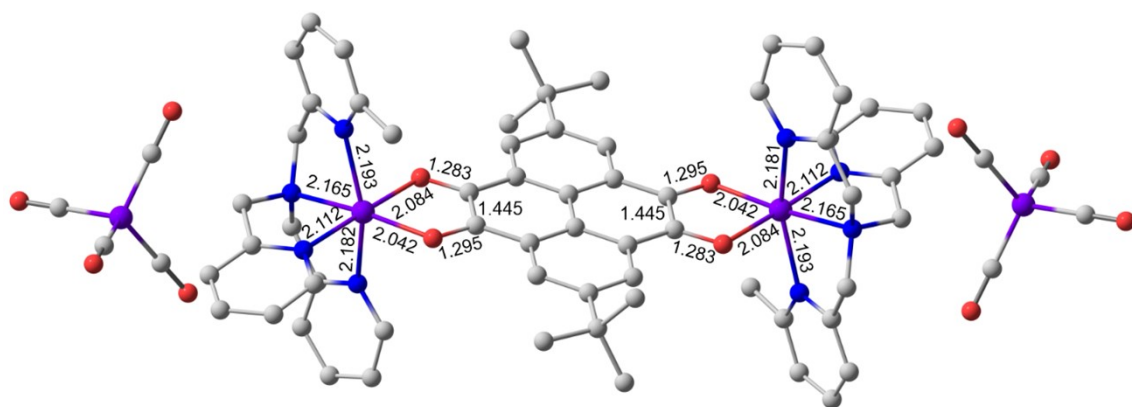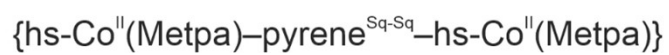

**Figure S17.** Optimized geometries of the compound **4** in the three charge distributions, as calculated by the DFT UTPSSh/6-311++G(d,p) method.

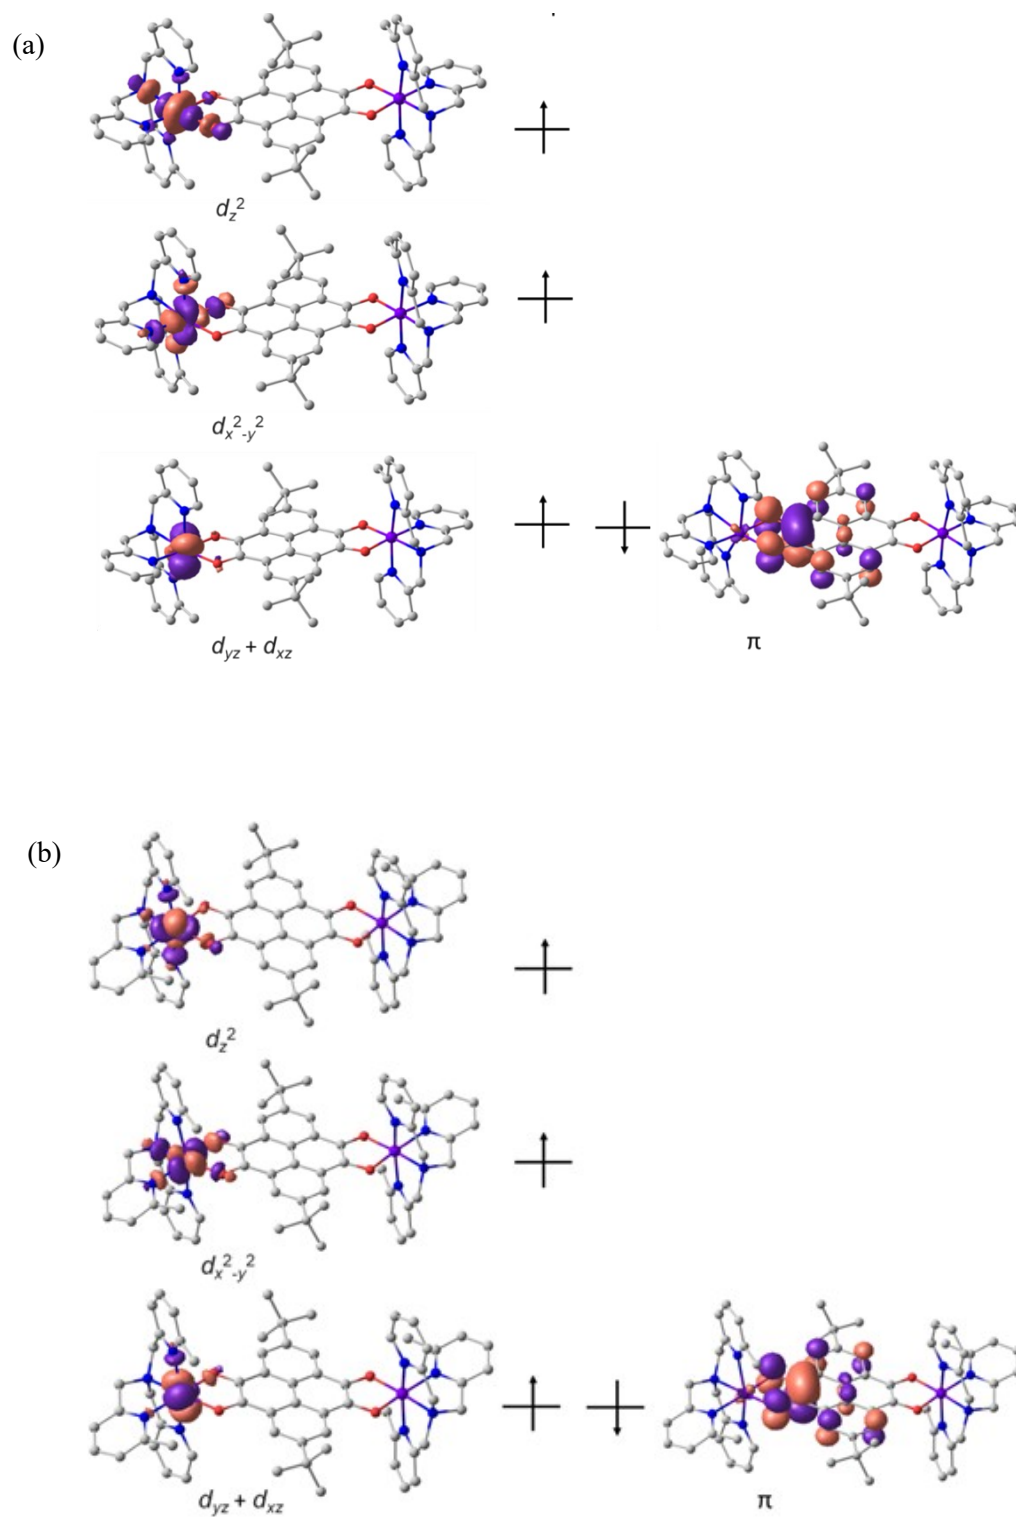

**Figure S18.** Corresponding orbitals for **4** (a) and **5** (b) visualizing the Co<sup>II-HS</sup>-Sq1 exchange interactions, as calculated by the DFT UTPSSh/6-311++G(d,p) method (contour value = 0.03 e Å<sup>-3</sup>).



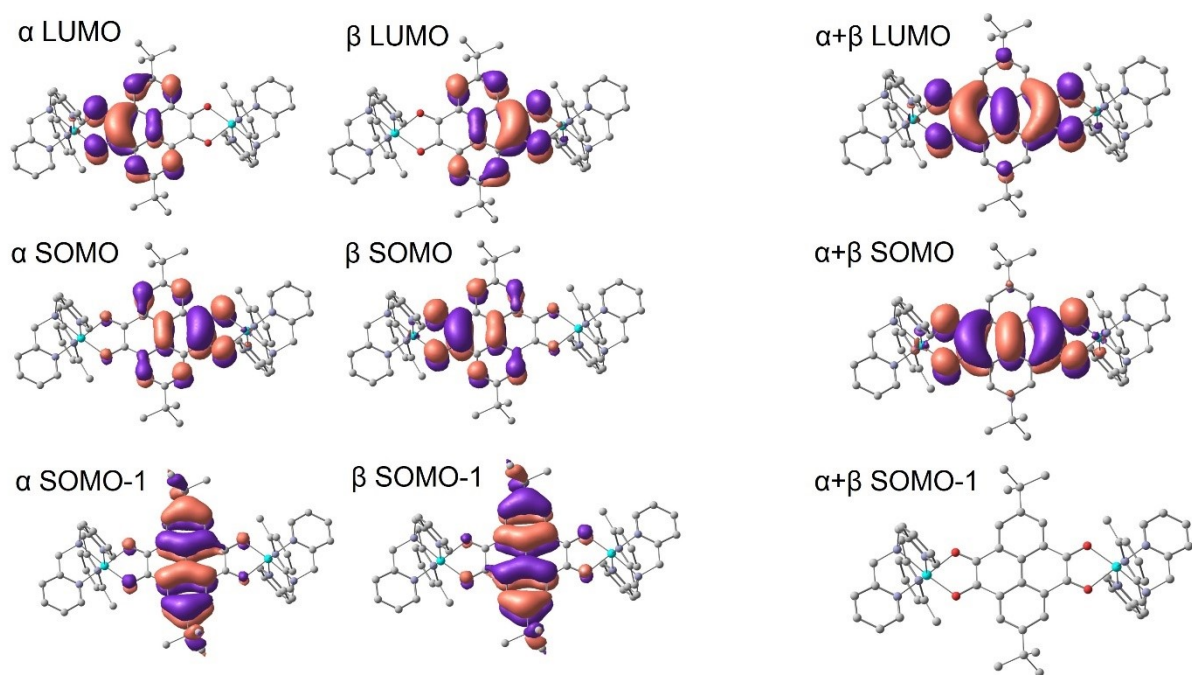

**Figure S19.** Corresponding orbitals for Zn-SQ-SQ-Zn analogs of **4** and **5** visualizing the  $\text{Co}^{\text{II-HS}}$ -Sq1 exchange interactions, as calculated by the DFT UTPSSh/6-311++G(d,p) method (contour value =  $0.03 \text{ e } \text{\AA}^{-3}$ ).



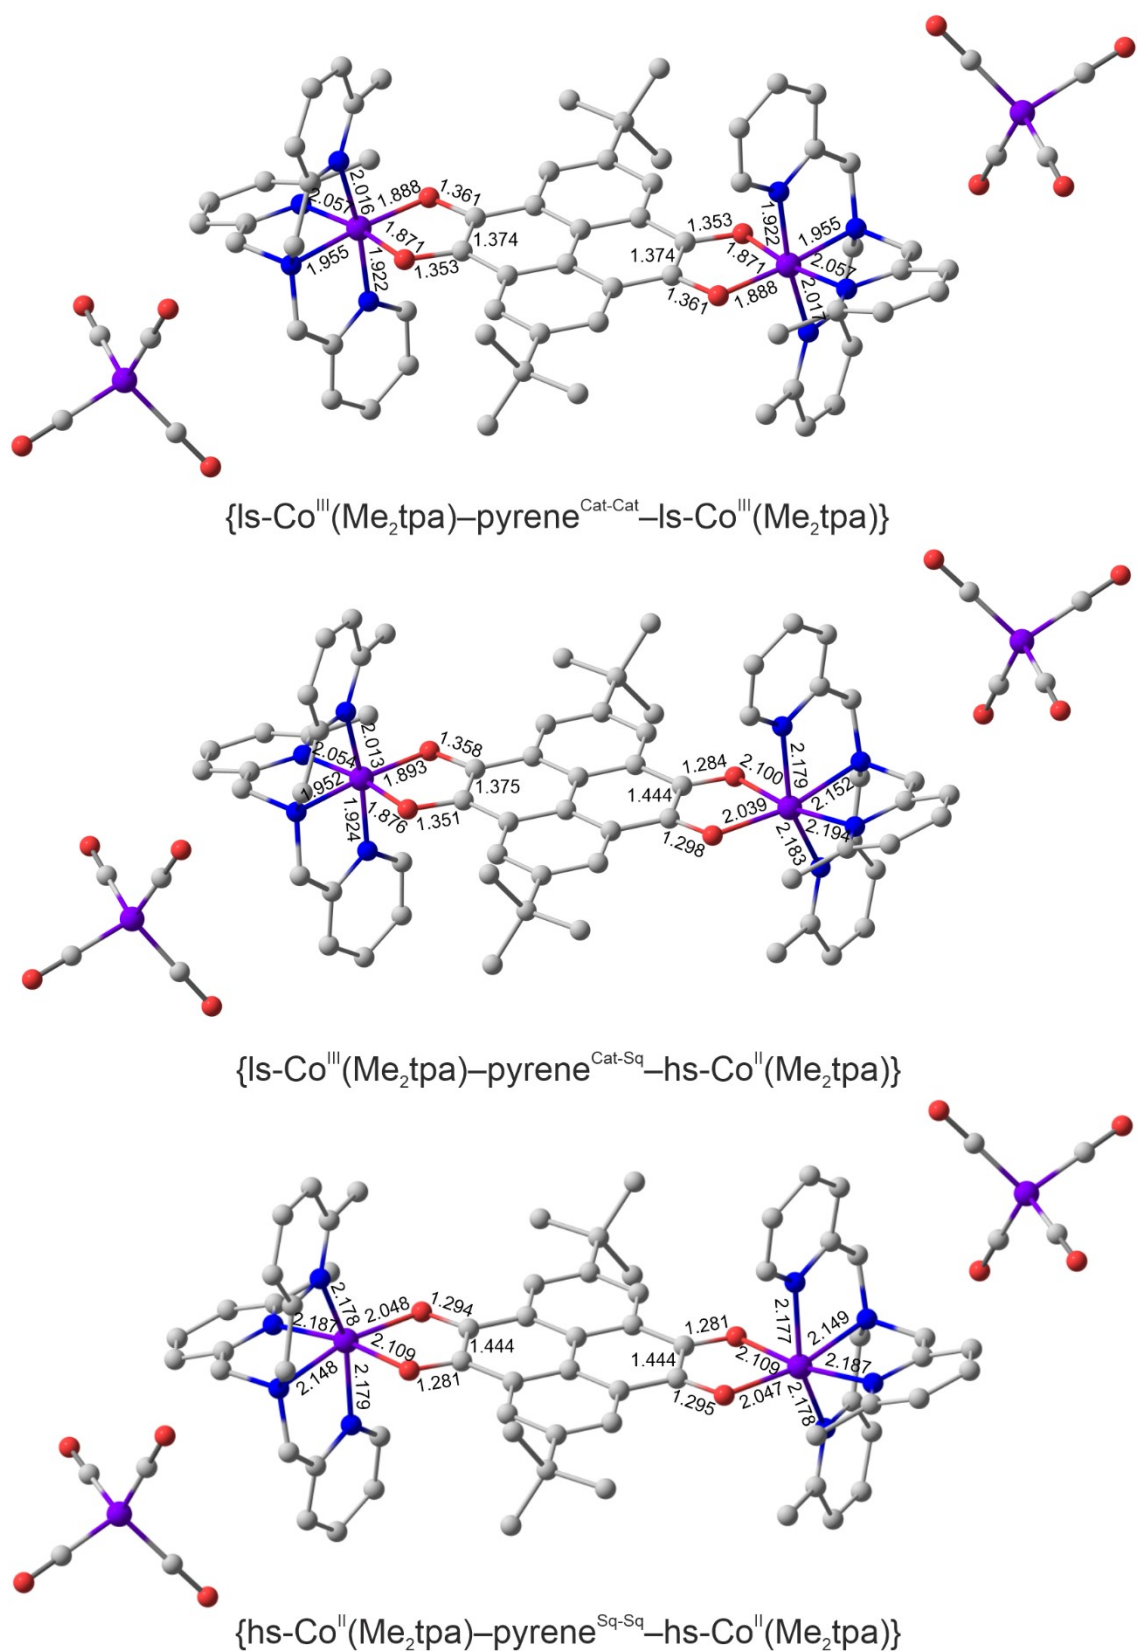

**Figure S20.** Optimized geometries of the compound **5** in the three charge distributions, as calculated by the DFT UTPSSh/6-311++G(d,p) method.
